# Supplementary material for: Highly sensitive detection of nitrobenzene by a series of fluorescent 2D zinc(ii) metal–organic frameworks with a flexible triangular ligand
Source: Royal Society of Chemistry journal article supplement (doi:10.1039/d1ra03737d), 2021-01-01
Supplement: d1ra03737d1.pdf [file d1ra03737d1.pdf]

*Electronic Supplementary Information for*

**Highly sensitive detection for nitrobenzene of a series of fluorescent  
2D zinc(II) organic frameworks with a flexible triangular ligand**

Xue Yang, Yixia Ren\*, Hongmei Chai, Xiufang Hou\*, Zhixiang Wang, Jijiang Wang

*College of Chemistry and Chemical Engineering, Laboratory of New Energy and New Function Materials,  
Shaanxi Key Laboratory of Chemical Reaction Engineering, Yan'an University, Yan'an 716000, P. R. China.*

*E-mail: [renyixia1@163.com](mailto:renyixia1@163.com)*

**RSC adv.**

**Table S1 Selected bond lengths (Å) and bond angles (°) for 1**

| Bond              | Dist.      | Bond              | Dist.     |
|-------------------|------------|-------------------|-----------|
| Zn(1)-O(7)        | 1.920(2)   | Zn(1)-N(1)        | 2.046(2)  |
| Zn(1)-O(4)#1      | 1.9470(19) | Zn(1)-N(2)        | 2.054(2)  |
| Angle             | (°)        | Angle             | (°)       |
| O(7)-Zn(1)-O(4)#1 | 121.45(10) | O(4)#1-Zn(1)-N(1) | 99.22(8)  |
| O(7)-Zn(1)-N(1)   | 123.44(9)  | O(4)#1-Zn(1)-N(2) | 105.90(9) |
| O(7)-Zn(1)-N(2)   | 102.71(10) | N(1)-Zn(1)-N(2)   | 101.49(9) |

(symmetrical codes: #1 -x+2,-y+1,-z #2 -x,-y+1,-z #3 -x+1,-y,-z+1 )

**Table S2 Selected bond lengths (Å) and bond angles (°) for 2**

| Bond                | Dist.      | Bond            | Dist.      |
|---------------------|------------|-----------------|------------|
| Zn(1)-O(8)          | 1.8923(19) | Zn(2)-O(8)      | 1.8848(19) |
| Zn(1)-O(7)#1        | 1.9662(16) | Zn(2)-O(1)      | 1.9517(18) |
| Zn(1)-O(4)#2        | 1.9786(16) | Zn(2)-N(5)      | 2.000(2)   |
| Zn(1)-N(4)#3        | 2.005(2)   | Zn(2)-N(1)      | 2.0067(19) |
| Angle               | (°)        | Angle           | (°)        |
| O(8)-Zn(1)-O(7)#1   | 107.99(7)  | O(8)-Zn(2)-O(1) | 113.63(8)  |
| O(8)-Zn(1)-O(4)#2   | 115.54(8)  | O(8)-Zn(2)-N(5) | 118.07(9)  |
| O(7)#1-Zn(1)-O(4)#2 | 104.64(7)  | O(1)-Zn(2)-N(5) | 103.62(8)  |
| O(8)-Zn(1)-N(4)#3   | 120.84(10) | O(8)-Zn(2)-N(1) | 111.20(9)  |
| O(7)#1-Zn(1)-N(4)#3 | 101.55(8)  | O(1)-Zn(2)-N(1) | 98.28(8)   |
| O(4)#2-Zn(1)-N(4)#3 | 104.35(8)  | N(5)-Zn(2)-N(1) | 110.05(9)  |

(symmetrical codes: #1 -x-1,-y,-z+1 #2 -x,-y,-z+1 #3 -x+1,-y-1,-z #4 -x+1,-y,-z+1 )

**Table S3 Selected bond lengths (Å) and bond angles (°) for 3**

| Bond                | Dist.      | Bond                | Dist.      |
|---------------------|------------|---------------------|------------|
| Zn(1)-O(8)          | 1.925(2)   | Zn(2)-O(8)          | 1.938(2)   |
| Zn(1)-O(1)          | 1.9358(19) | Zn(2)-O(4)#1        | 2.0066(19) |
| Zn(1)-O(3)#1        | 1.9841(19) | Zn(2)-O(6)#3        | 2.022(2)   |
| Zn(1)-N(4)#2        | 2.004(2)   | Zn(2)-N(1)          | 2.024(2)   |
| Angle               | (°)        | Angle               | (°)        |
| O(8)-Zn(1)-O(1)     | 110.50(9)  | O(8)-Zn(2)-O(4)#1   | 103.91(8)  |
| O(8)-Zn(1)-O(3)#1   | 106.96(8)  | O(8)-Zn(2)-O(6)#3   | 101.91(9)  |
| O(1)-Zn(1)-O(3)#1   | 103.85(9)  | O(4)#1-Zn(2)-O(6)#3 | 117.11(9)  |
| O(8)-Zn(1)-N(4)#2   | 116.51(9)  | O(8)-Zn(2)-N(1)     | 115.08(9)  |
| O(1)-Zn(1)-N(4)#2   | 119.59(9)  | O(4)#1-Zn(2)-N(1)   | 103.37(9)  |
| O(3)#1-Zn(1)-N(4)#2 | 96.68(9)   | O(6)#3-Zn(2)-N(1)   | 115.37(9)  |

(symmetrical codes: #1 -x+1/2,y+1/2,-z+1/2 #2 x-1,y+1,z #3 -x,-y+2,-z

#4 -x+1/2,y-1/2,-z+1/2 #5 x+1,y-1,z )

**Table S4 Selected bond lengths (Å) and bond angles (°) for 4**

| Bond              | Dist.      | Bond                | Dist.      |
|-------------------|------------|---------------------|------------|
| Zn(1)-O(1)#1      | 1.938(2)   | Zn(1)-N(1)          | 1.986(3)   |
| Zn(1)-O(7)        | 1.962(3)   | Zn(1)-N(4)#2        | 2.029(3)   |
| Angle             | (°)        | Angle               | (°)        |
| O(1)#1-Zn(1)-O(7) | 104.90(12) | O(1)#1-Zn(1)-N(4)#2 | 111.17(12) |
| O(1)#1-Zn(1)-N(1) | 117.75(13) | O(7)-Zn(1)-N(4)#2   | 96.88(12)  |
| O(7)-Zn(1)-N(1)   | 120.06(13) | N(1)-Zn(1)-N(4)#2   | 104.03(13) |

(symmetrical codes: #1 x,y+1,z #2 x+1,y+1,z+1 #3 x,y-1,z #4 x-1,y-1,z-1 )

**Table S5** The repeated test for luminescence emission intensities of 1-4 and the test errors.

| Complex | 1         |        | 2         |        | 3         |        | 4         |        |
|---------|-----------|--------|-----------|--------|-----------|--------|-----------|--------|
|         | intensity | error  | intensity | error  | intensity | error  | intensity | error  |
| Test 1  | 3539      | 2.27%  | 4648      | 0.12%  | 4583      | 2.89%  | 4206      | -1.04% |
| Test 2  | 3427      | -0.96% | 4587      | -1.19% | 4308      | -3.29% | 4203      | -1.13% |
| Test 3  | 3415      | -1.31% | 4692      | 1.07%  | 4472      | 0.39%  | 4344      | 2.19%  |
| Mean    | 3460      |        | 4642      |        | 4454      |        | 4251      |        |

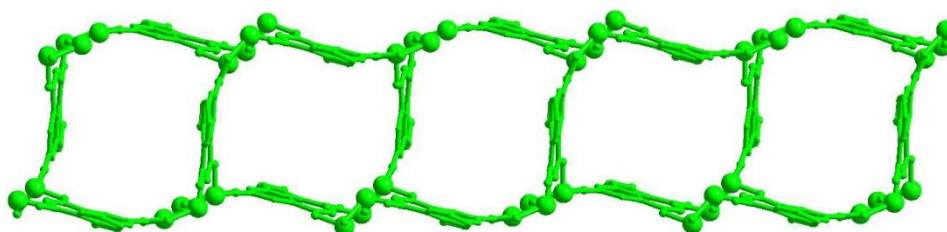**Fig. S1** 1D ladder-like chain in 3

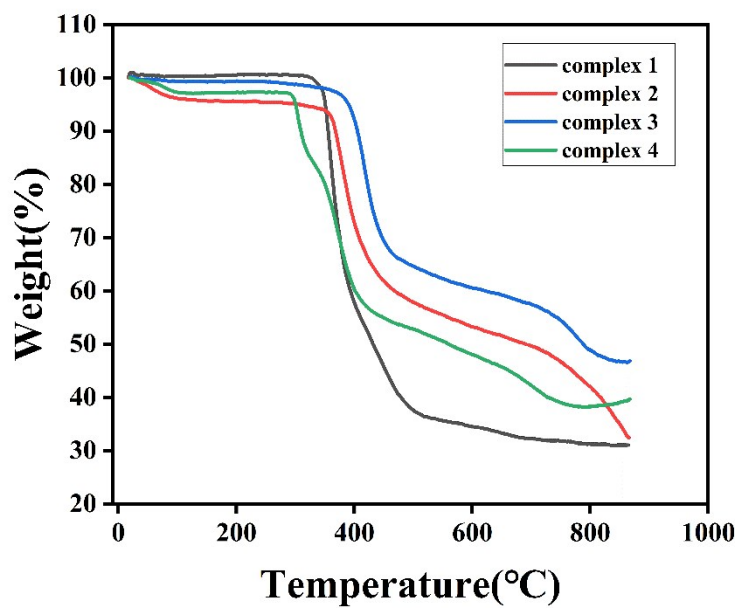

Fig. S2 TG curves of complexes 1-4.

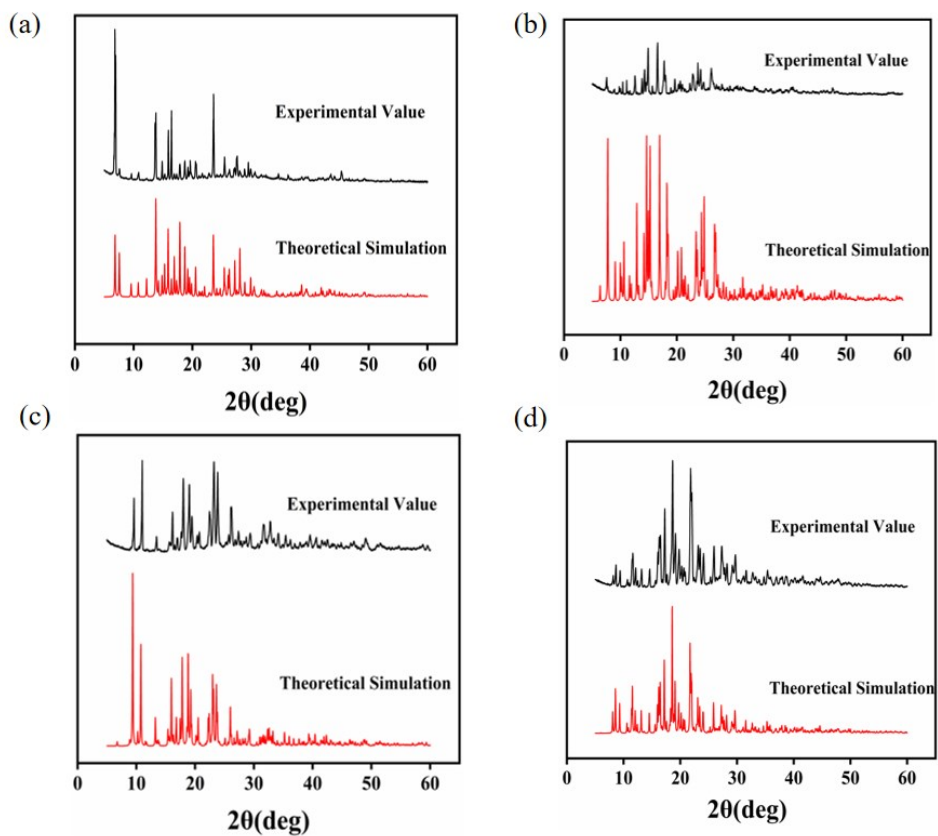

Fig.S3 The PXRD patterns of complexes 1(a), 2(b), 3(c) and 4(d).

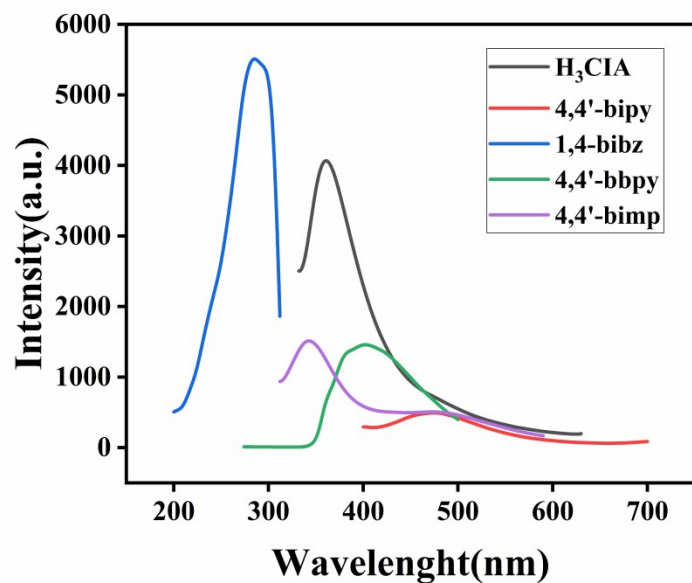

Fig.S4 The emission of the free ligands (H<sub>3</sub>CIA, 4,4'-bipy, 1,4-bibz, 4,4'-bbpy, 4,4'-bimp)

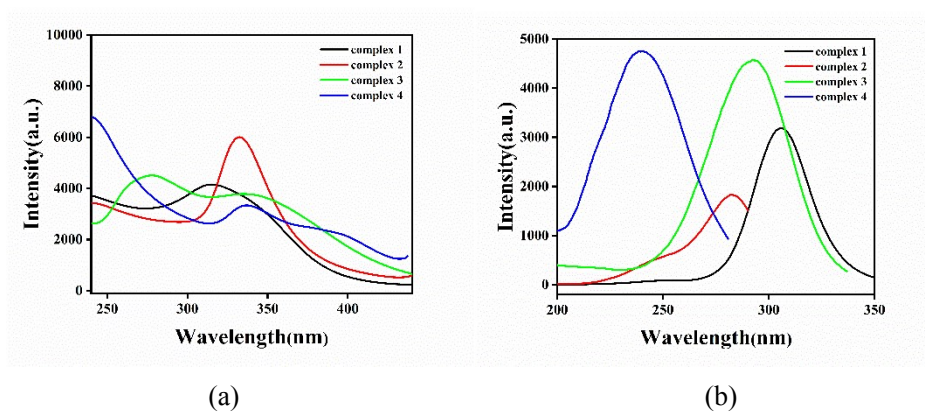

Fig.S5 The excitation spectra of complexes 1-4

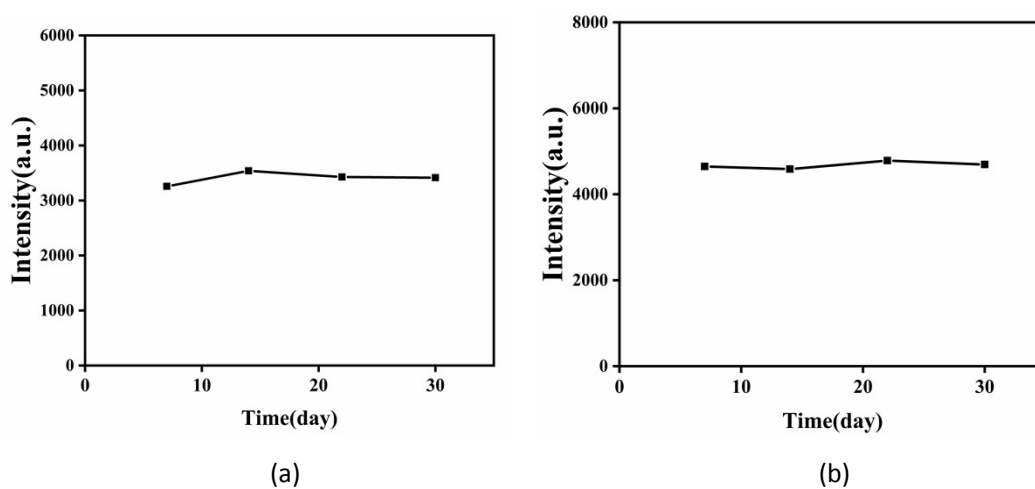

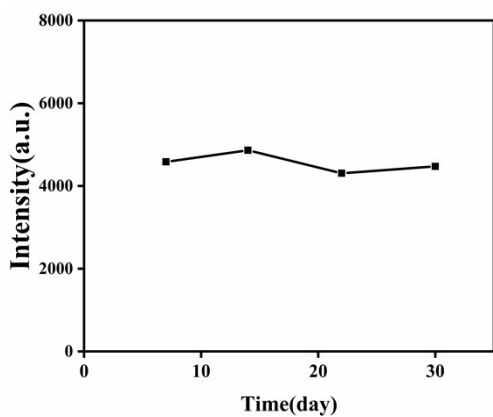

(c)

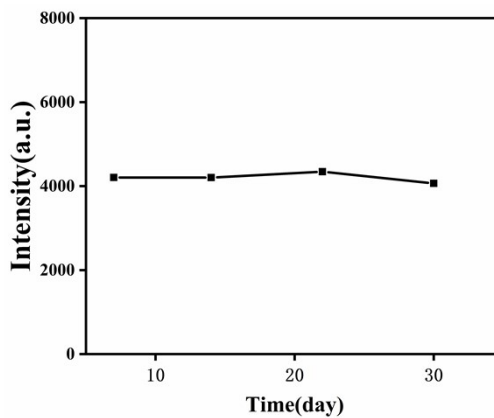

(d)

**Fig. S5** Fluorescence time diagram of the complexes 1(a),2(b),3(c),4(d).

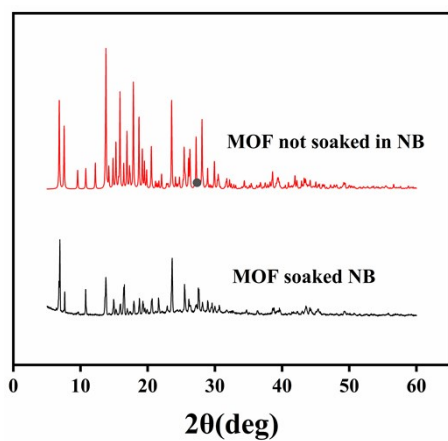

(a)

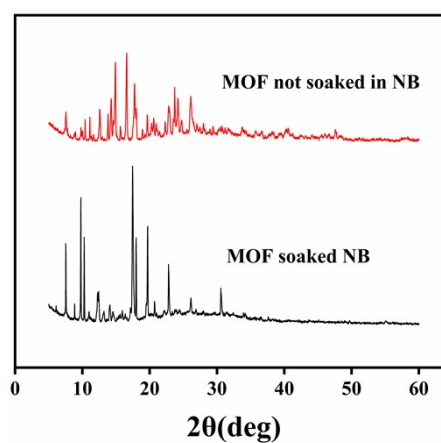

(b)

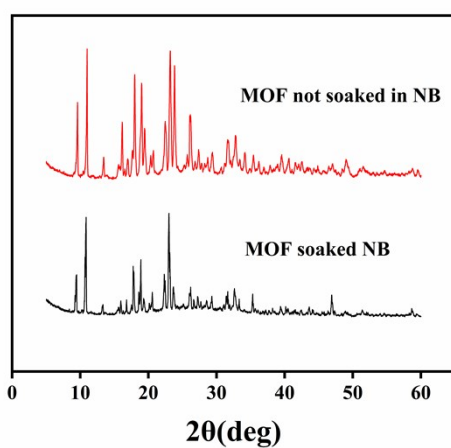

(c)

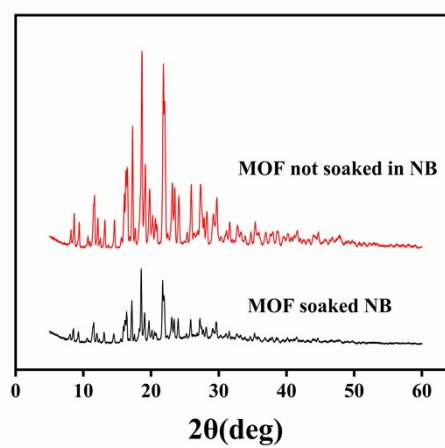

(d)

**Fig. S6** PXRD patterns of complexes 1(a),2(b),3(c),4(d) with and without NB immersion
